# Supplementary material for: Somatic copy number alterations in gastric adenocarcinomas among Asian and Western patients
Source: PubMed Central journal article supplement (PMC5398631; doi:10.1371/journal.pone.0176045), 2017-04-20

**S3 Fig. Distributions of arm-level (x-axis) and focal (y-axis) event frequencies across samples.** Each sample is represented by a circle; colors indicate East/West status or molecular subtypes as indicated). Colored crosses indicate group medians at intersections and group quartiles by extents. Asterisks indicate  $p < 0.05$ ; “N.S.” indicates  $p > 0.05$ . A) Gain/amplification and (B) loss/deletion frequencies (across all samples. (C-D) Loss/deletion frequencies within (C) CIN subtype, (D) non-CIN subtype. (E) Loss/deletion frequencies excluding samples without arm-level deletions. (F) Loss/deletion frequencies across subtypes within TCGA.

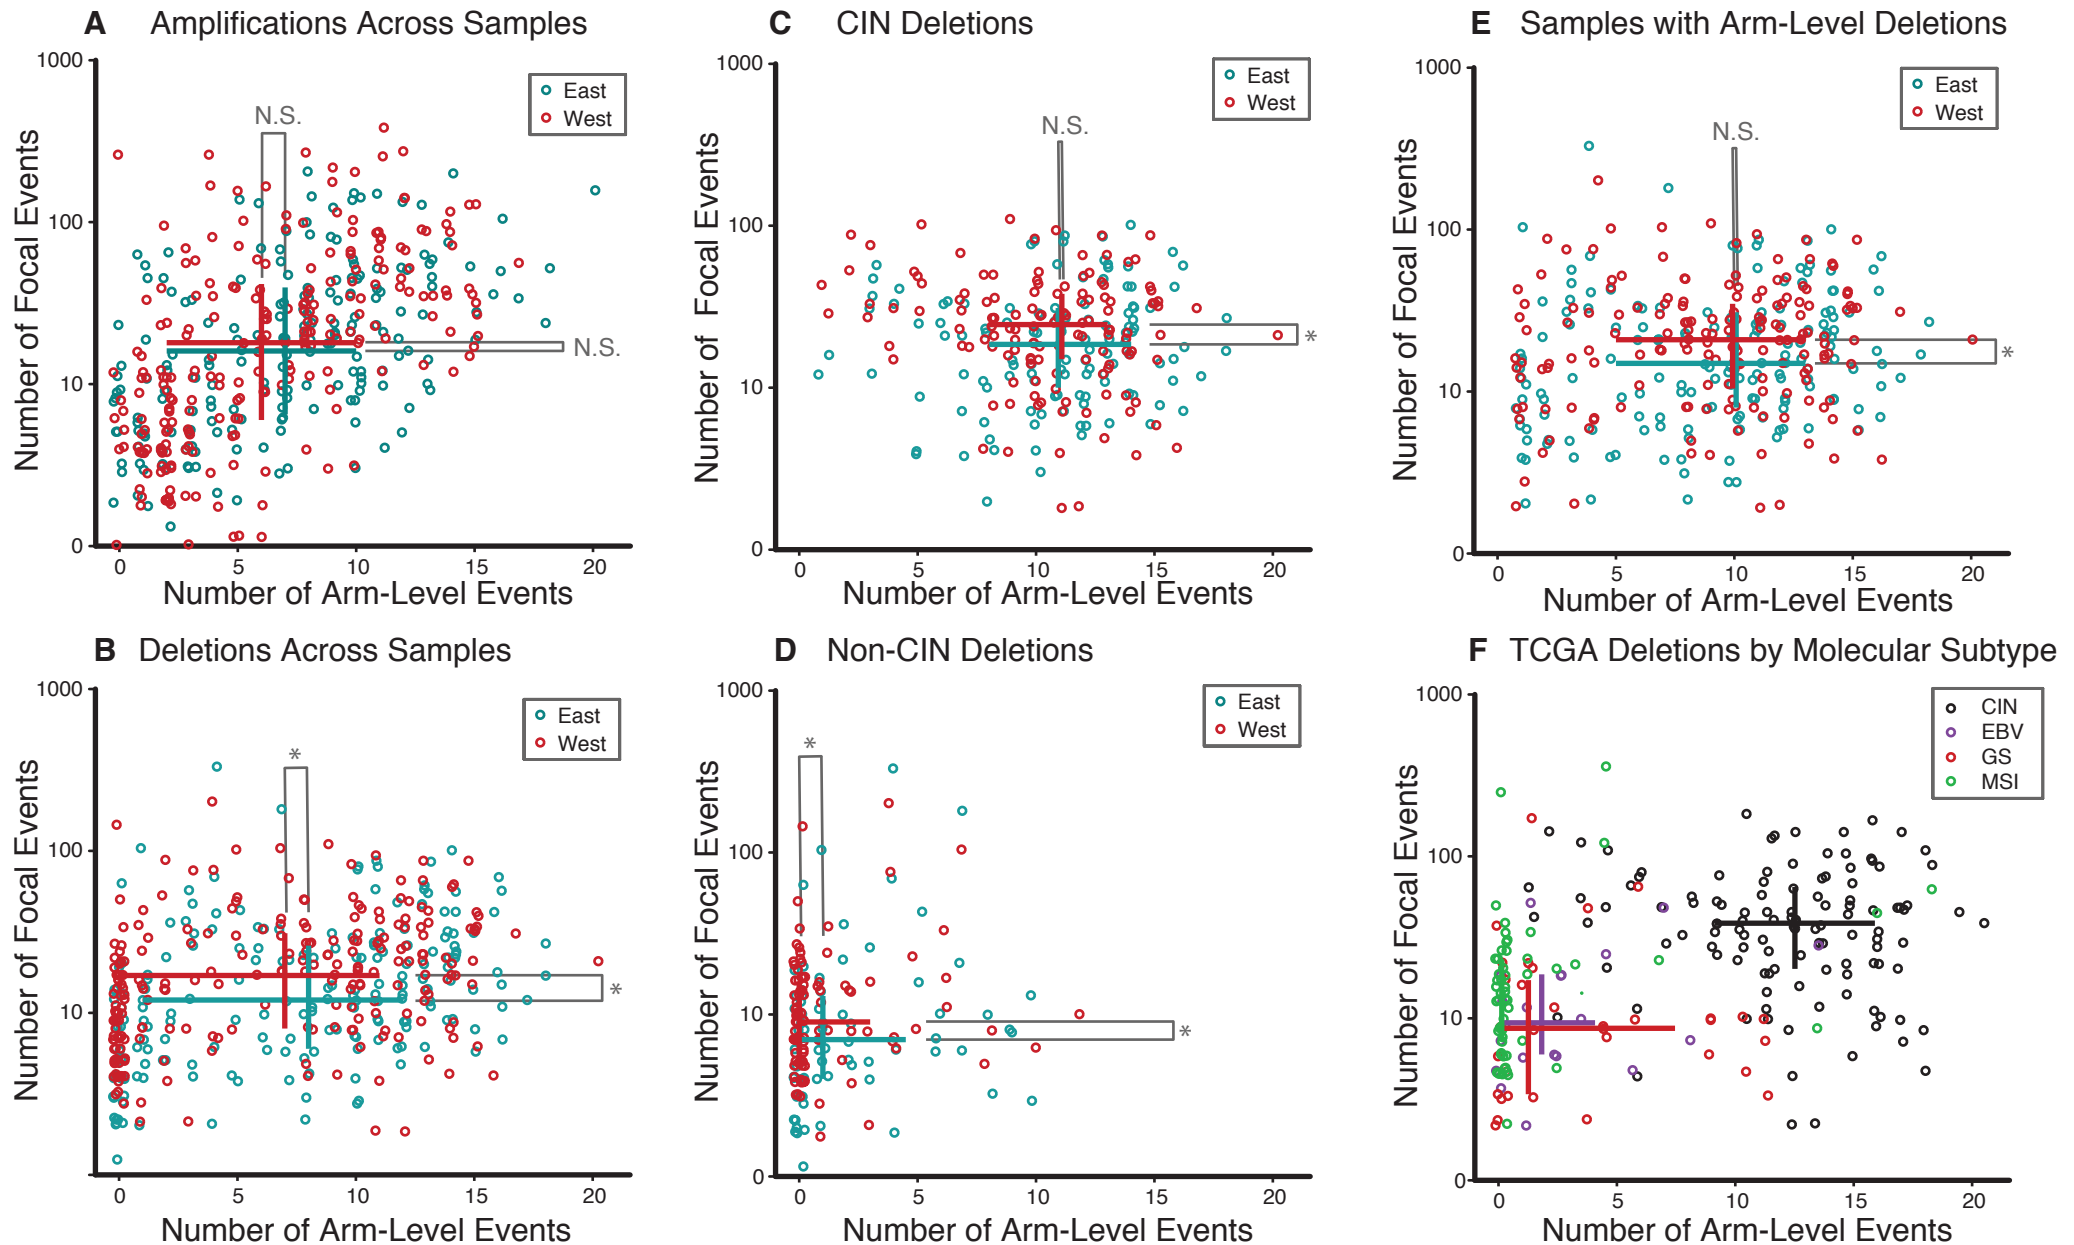

Supplement: pone.0176045.s004.pdf [file pone.0176045.s004.pdf]
