# Supplementary material for: Somatic copy number alterations in gastric adenocarcinomas among Asian and Western patients
Source: PubMed Central journal article supplement (PMC5398631; doi:10.1371/journal.pone.0176045), 2017-04-20

**S4 Fig. Frequencies (x-axis) of arm-level gains (red) and losses (blue) between East (left) and West (right) cohorts.** Events are indicated by chromosome arm. Vertical and horizontal arrows summarize the overall and difference in frequencies respectively using an average weighted by arm size. Each panel analyzes a different subgroup with a pie graph indicating the size of the group and its East-West composition. (A) All ABSOLUTE-called data. (B) CIN samples. (C) Non-CIN samples. (D) Non-CIN samples with arm-level deletions. (E) Non-CIN samples without arm-level deletions (enriched for MSI).

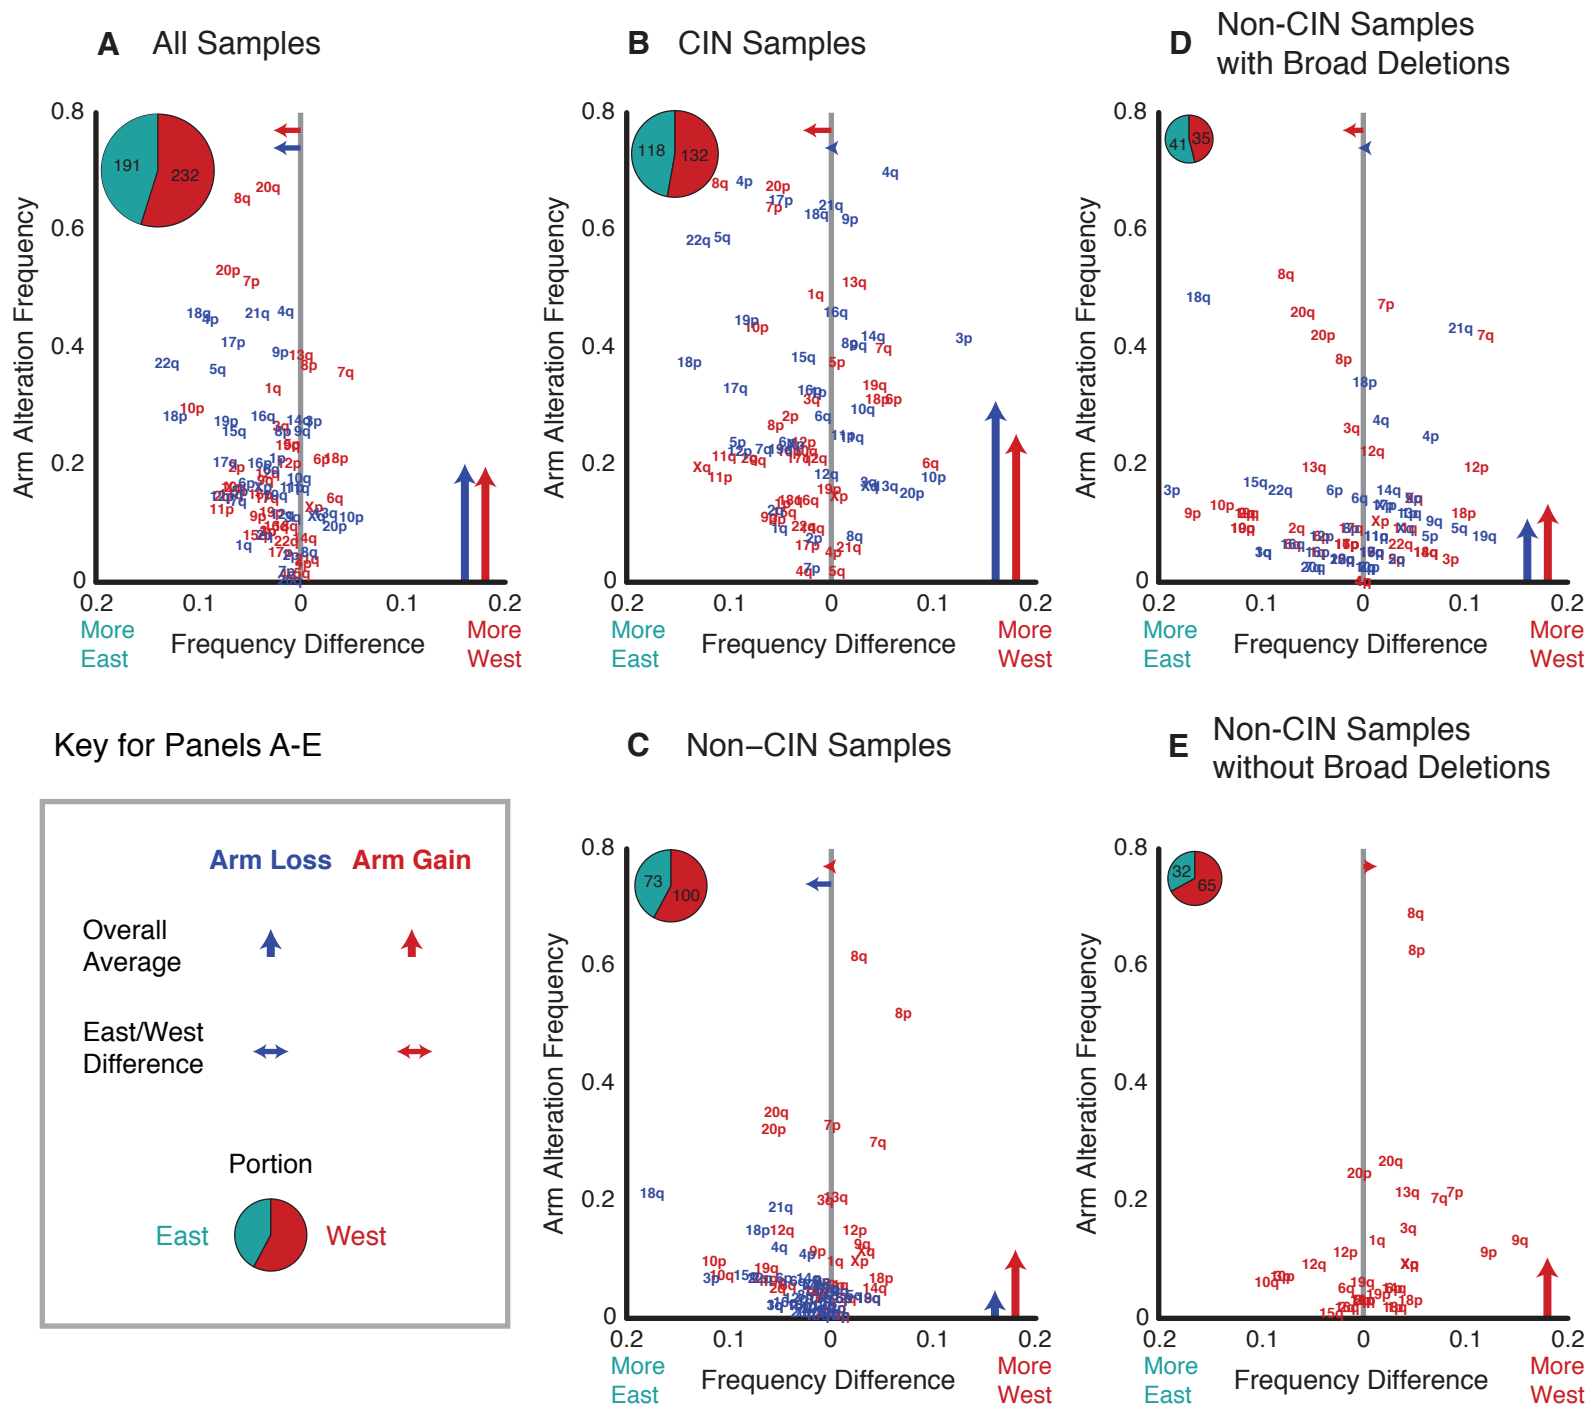

Supplement: pone.0176045.s005.pdf [file pone.0176045.s005.pdf]
