# Supplementary material for: Somatic copy number alterations in gastric adenocarcinomas among Asian and Western patients
Source: PubMed Central journal article supplement (PMC5398631; doi:10.1371/journal.pone.0176045), 2017-04-20

Figure S5. Focal copy-number profiles at the *PTPRD* locus across all Western (top) and Eastern (bottom) samples.

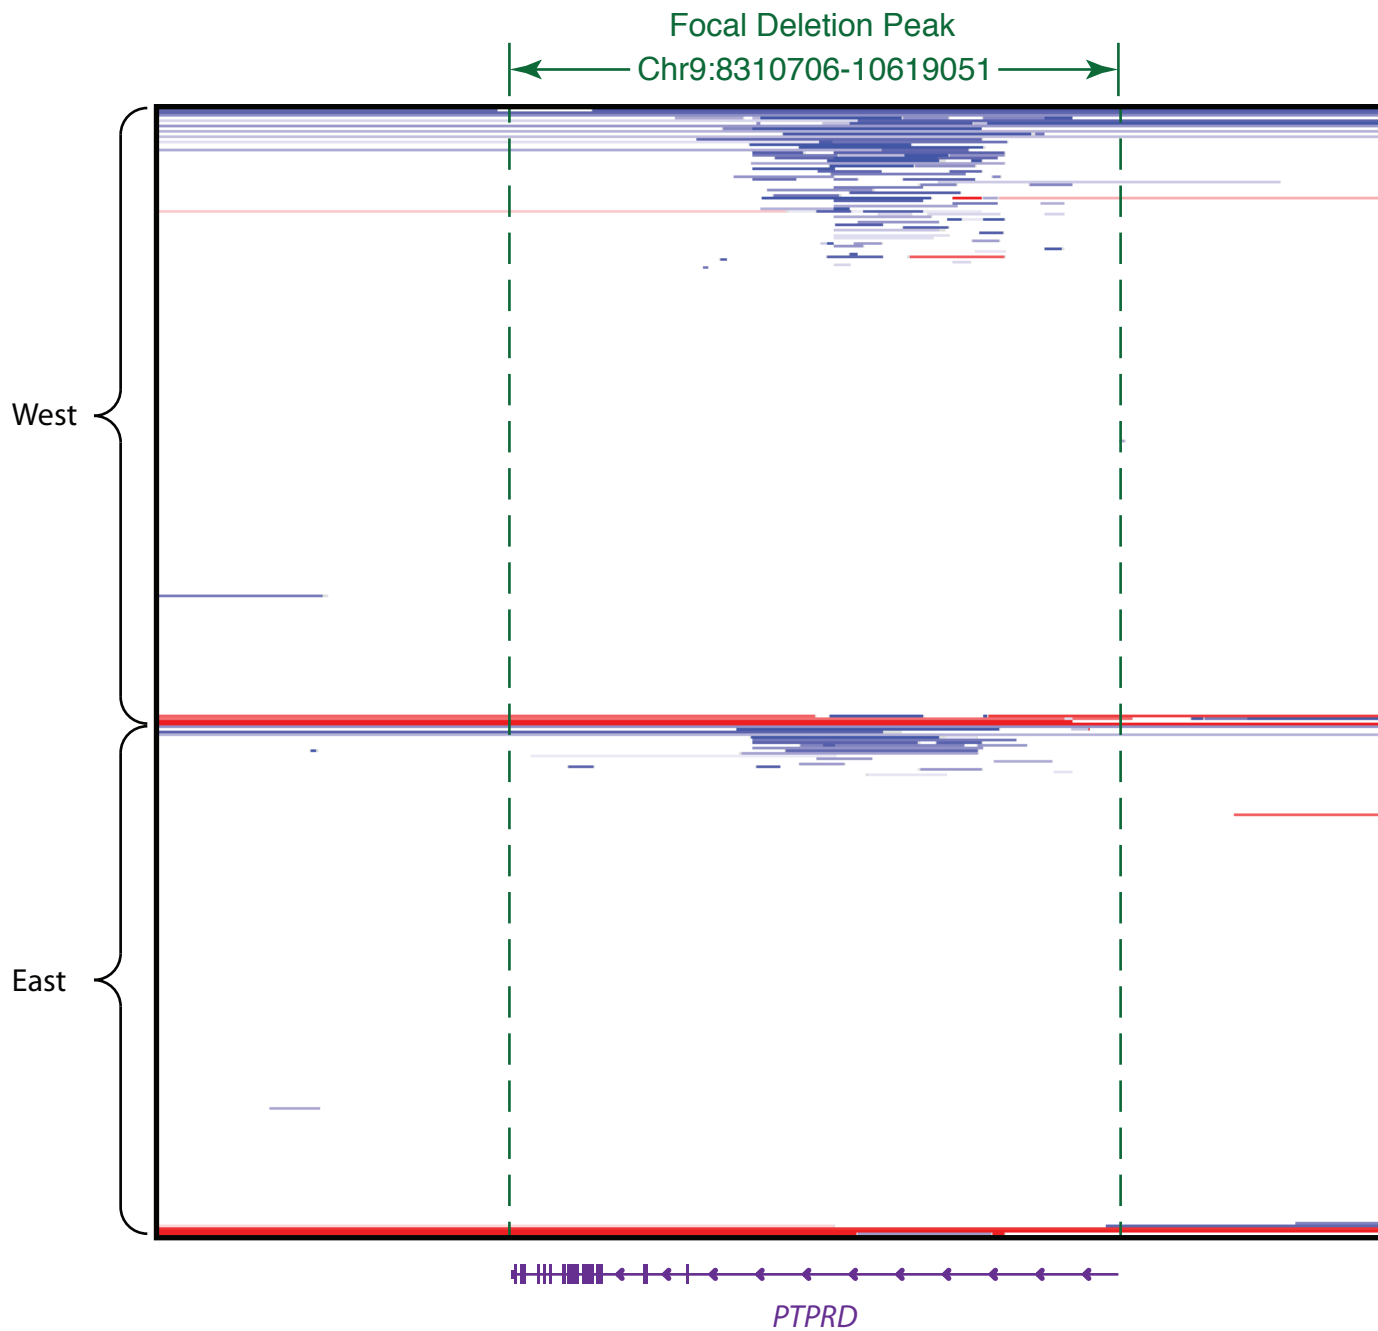

Supplement: pone.0176045.s006.pdf [file pone.0176045.s006.pdf]
